# Supplementary material
Source: PubMed Central journal article supplement (PMC4269802)

# Mapping Diffusion in a Living Cell Using the Phasor Approach

Suman Ranjit,<sup>1</sup> Luca Lanzano,<sup>2,3</sup> and Enrico Gratton<sup>1,\*</sup>

<sup>1</sup>Laboratory for Fluorescence Dynamics, Department of Biomedical Engineering, University of California Irvine, Irvine, California; <sup>2</sup>Department of Nanophysics, Italian Institute of Technology, Genoa, Italy; and <sup>3</sup>Department of Physics, University of Genoa, Genoa, Italy

## Supplementary Information:

**FIGURE S1.** Relation between diffusion coefficient, correlation time and characteristic pixel dwell time. The correlation time and pixel dwell time was calculated for a PSF with  $0.3 \mu\text{m}$  waist. The pixel dwell times are calculated based on 128 repeat measurements at each pixel. The faster pixel dwell times are accessible using the point scan mode and the slower pixel dwell times are accessible using the line scan mode.

**FIGURE S2.** Comparability between the diffusion measurements using RICS and phasor FCS approaches for GFP in DPBS. Panel A describes the fit and difference from the RICS analysis. The top part of this panel shows the difference between the autocorrelation and the fit, and appears random. The bottom part of the figure shows the autocorrelation function plotted in three dimensions. The magnitude of the autocorrelation function determines the height of the peak. In both top and bottom figures, horizontal correlation shift,  $\xi$ , is represented by the horizontal axis and the vertical axis represents the vertical correlation shift,  $\psi$ . The original correlation function and the fits are of same size,  $64 \times 64$  pixel. Panel B shows the histogram of diffusion coefficients calculated from phasor FCS measurements. The maxima of this distribution, when fitted with the  $\omega_0$  value recovered from RICS is at  $91 \mu\text{m}^2/\text{s}$ , showing strong similarity to the value used for the RICS calibration,  $90 \mu\text{m}^2/\text{s}$ .

**FIGURE S3.** The correlation between the RICS (A) and phasor FCS measurements (B) of the hIR-GFP labeled CHOK1 cells. The RICS measurement in two different areas yield a value of  $0.18 \mu\text{m}^2/\text{s}$  (green square) and  $0.98 \mu\text{m}^2/\text{s}$  (red square) which is similar to the values obtained by the stsFCS method and presented in the diffusion histogram (B, ii).

**FIGURE S4.** The inhomogeneity in the diffusion measurements of the hIR-GFP cells. Panel (A), (B) and (C) show the intensity maps, diffusion maps and the diffusion phasor plots, respectively. The panel (C) shows that the position and distribution of the points in the phasor histograms can be very different for the hIR-GFP in different cells.

**Movie S1.** 3D intensity map of the cell where the intensity was used as the wireframe. The height in Z axis represents the extent of intensity. The image was then color mapped according to the chosen cursors in (Fig. 3 C). The color of the mask at the peaks is mostly green, representing slow diffusion in the focal adhesion sites.

Figure S1

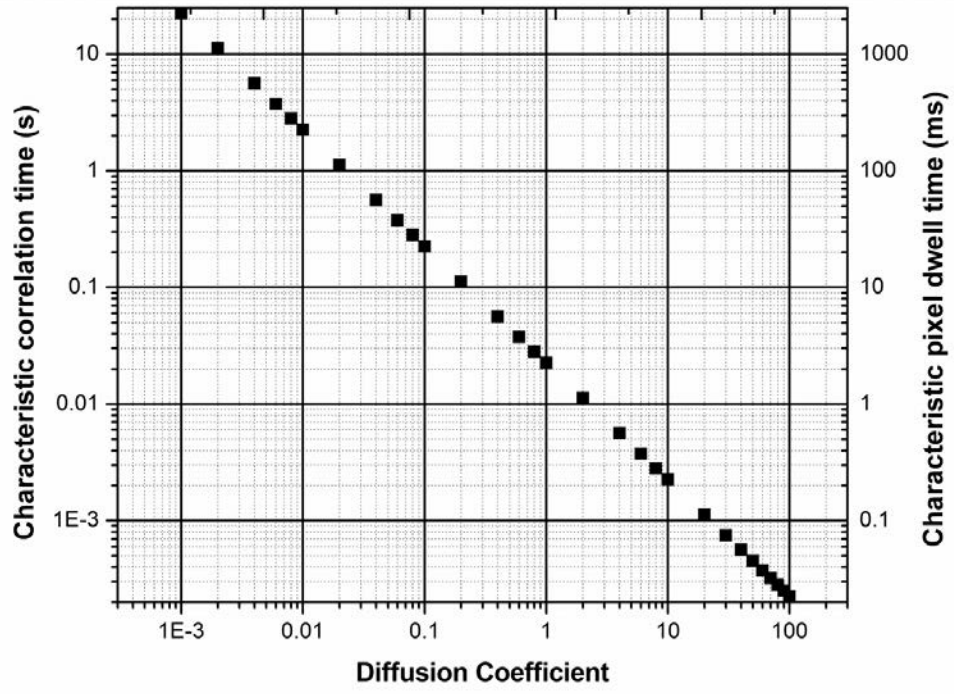

Figure S2

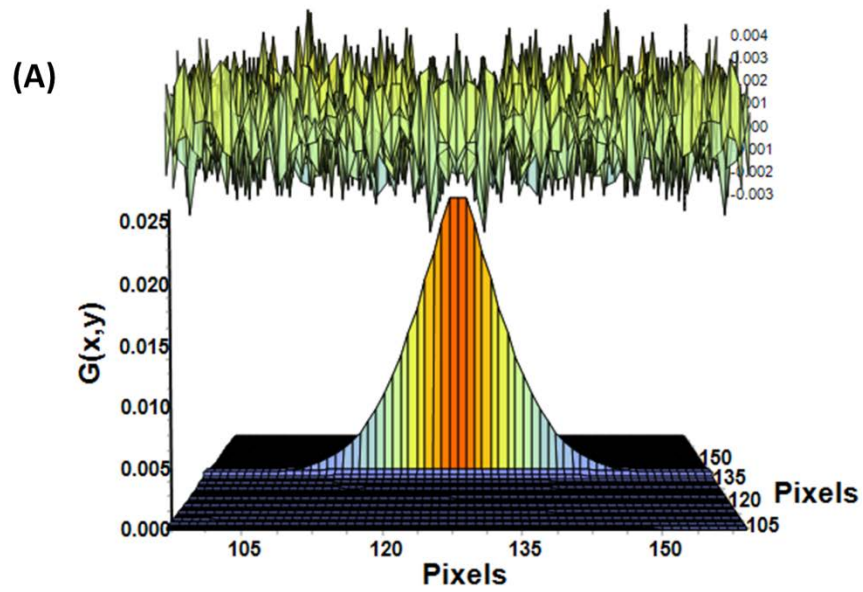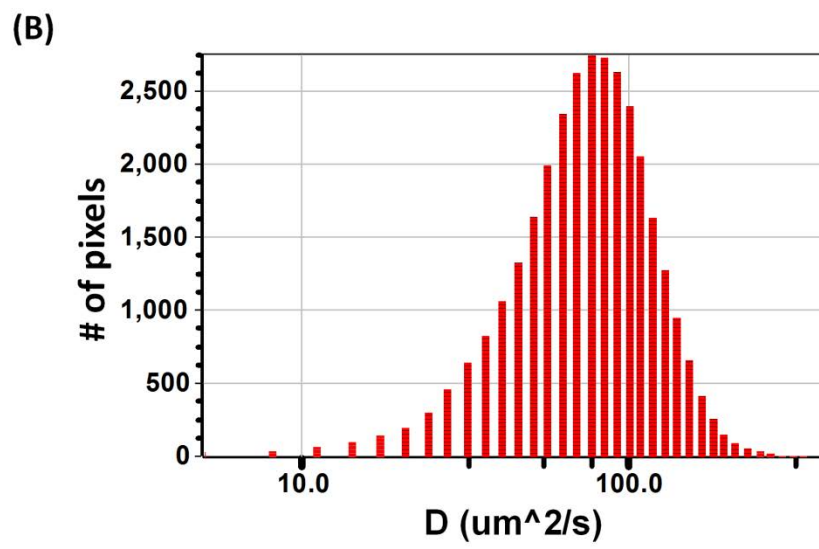

Figure S3

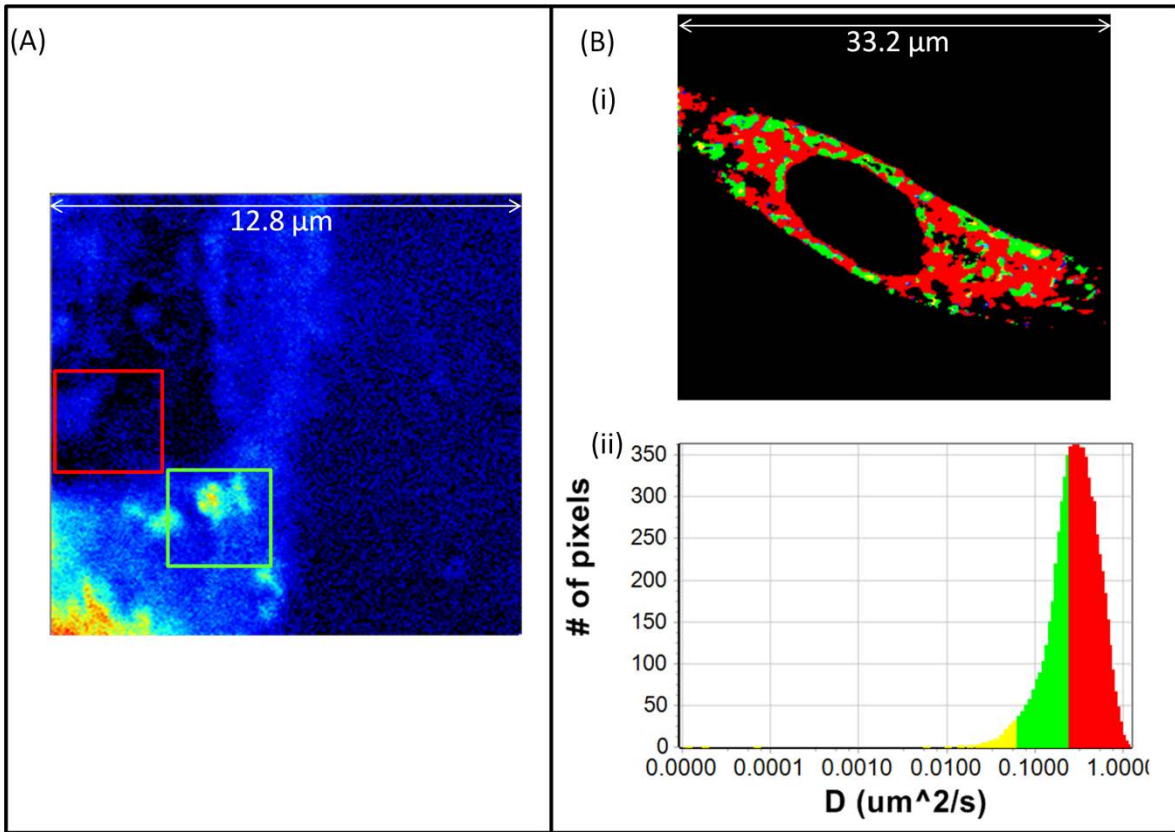

Figure S4

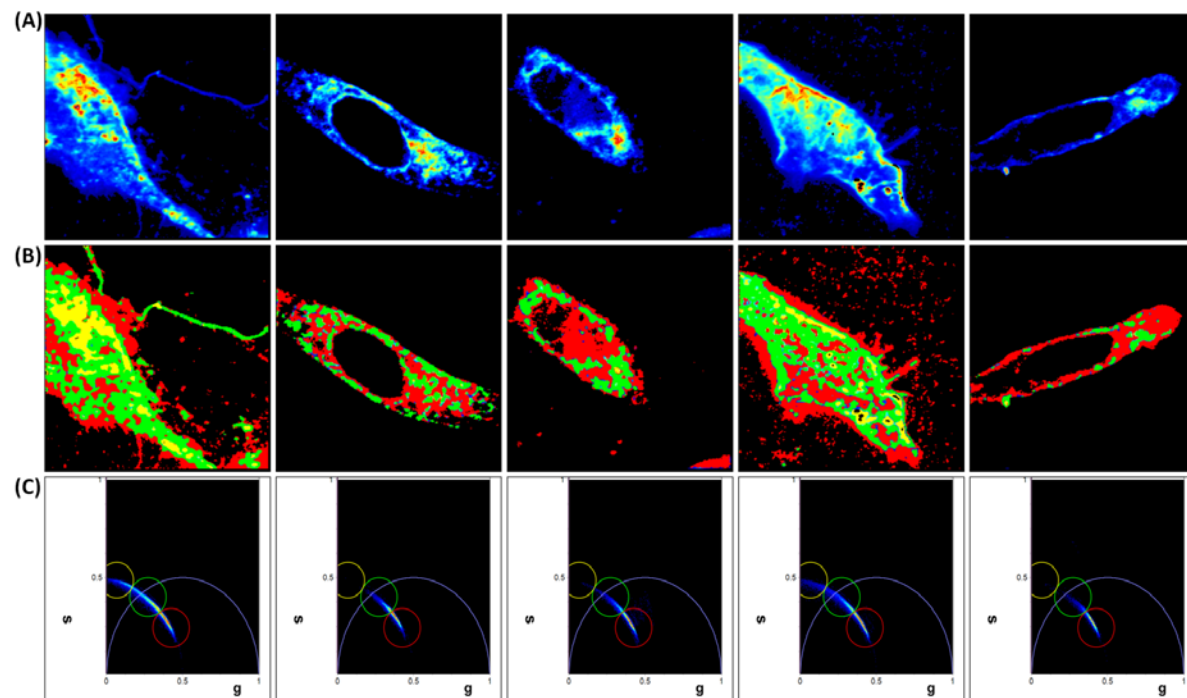

Supplement: mmc1.pdf [file mmc1.pdf]
